# Supplementary material for: Optimization and prediction of the electron–nuclear dipolar and scalar interaction in1H and13C liquid state dynamic nuclear polarization
Source: Royal Society of Chemistry journal article supplement (doi:10.1039/c5sc02499d), 2015-01-01
Supplement: c5sc02499d1.pdf [file c5sc02499d1.pdf]

## Optimization and Prediction of the Electron-Nuclear Dipolar and Scalar Interaction in $^1\text{H}$ and $^{13}\text{C}$ Liquid State Dynamic Nuclear Polarization

X. Wang,<sup>a</sup> W. C. Isley III<sup>\*b</sup>, S. I. Salido<sup>a</sup>, Z. Sun<sup>a</sup>, L. Song<sup>a</sup>, K. H. Tsai<sup>a</sup>, C. J. Cramer<sup>b</sup>, and H. C. Dorn<sup>\*a</sup>

<sup>a</sup>Department of Chemistry, Virginia Tech, Blacksburg, Virginia, 24061

<sup>b</sup>Department of Chemistry and Minnesota Supercomputing Institute, University of Minnesota, Minneapolis, Minnesota, 55455-0431

### SUPPORTING INFORMATION

#### CONTENTS

- Estimation of Benzene Correlation Times in SF CO<sub>2</sub> and Normal Solvents
- Figure S1: Apparatus for Continuous-flow HPLC-DNP-NMR Coupled with SF CO<sub>2</sub>
- Determination of Absolute DNP Enhancement in the Flow DNP Experiments
- Ratio Method
- Table S1: Absolute  $^{13}\text{C}$  DNP Enhancements and Relaxation Data for 0.5 M Adamantane/Benzene/0.1 M TEMPO System
- Table S2: Electron Saturation factors of Benzene/TEMPO system in SF CO<sub>2</sub> and C<sub>6</sub>D<sub>6</sub>
- Figure S2: The EPR field plot of 9% benzene/0.001 M TEMPO in SF CO<sub>2</sub>
- Figure S3-S4: LLIT  $^1\text{H}$  DNP Saturation Plots of Benzene/TEMPO system in SF CO<sub>2</sub> and Normal Solvents
- Table S3: LLIT  $^{13}\text{C}$  DNP Enhancements and Relaxation Data and Leakage Factor for Different Carbons of C<sub>70</sub>/C<sub>6</sub>D<sub>6</sub>/0.1 M TEMPO and C<sub>60</sub>/C<sub>6</sub>D<sub>6</sub>/0.1 M TEMPO Systems and Angle Strain Parameters
- Table S4:  $^{13}\text{C}$  NMR Contact Shift of C<sub>70</sub>/TEMPO/ODCB/C<sub>6</sub>H<sub>12</sub> and C<sub>60</sub>/TEMPO/C<sub>6</sub>D<sub>6</sub> System
- Figure S5: Coupling factor derived from dipolar dominant  $^{13}\text{C}$  LLIT DNP absolute enhancement of the indicated ipso carbons of substituted benzenes and carbonyls of small molecules
- Table S5 and Figure S6-S9:  $a_{\text{FC}}$  via DFT Modeling and Considered Lowest-Energy Molecular Configurations of Benzene/TEMPO System
- Table S6 and Figure S10-S14:  $a_{\text{FC}}$  via DFT Modeling and Considered Lowest-Energy Molecular Configurations of Phenyl Acetylene/TEMPO System
- Table S7 and Figure S15-S20:  $a_{\text{FC}}$  via DFT Modeling and Considered Lowest-Energy Molecular Configurations of Benzaldehyde/TEMPO System
- Table S8 and Figure S21-S25:  $a_{\text{FC}}$  via DFT Modeling and Considered Lowest-Energy Molecular Configurations of Nitrobenzene/TEMPO System
- Figure S26: LLIT  $^{13}\text{C}$  Spectra of Nitrobenzene/TEMPO System
- Table S9-S16: LLIT  $^{13}\text{C}$  DNP Enhancements of Benzonitrile, Phenylamine, Anisole, Toluene, Diethyl malonate, Ethyl Acetoacetate, Acetone, and Acetonitrile with TEMPO
- XYZ Coordinates of Phenyl acetylene/TEMPO, Benzaldehyde/TEMPO, and Nitrobenzene/TEMPO systems.

**Estimation of correlation times** corresponding to benzene  $^1\text{H}$  DNP coupling factors in SF  $\text{CO}_2$  and normal solvent by rotational diffusion modulation of dipolar interaction. For rotational diffusion modulation, the radical induced dipolar transition probabilities can be expressed as:

$$2W_1^D = 3W_0^D = W_2^D/2 = (3/10)\gamma_S^2\gamma_I^2h^2\tau_r(n_p N_e/N_p)d_r^{-6}J_r(\omega_i) \quad (\text{S1})$$

$$\tau_r = 4\pi b^3\eta/3kT \quad (\text{S2})$$

$$J(\omega_i) = 1/(1 + \omega_i^2\tau_r^2) \quad (\text{S3})$$

$\tau_r$  is the rotational correlation time;  $n_p$  is the number of receptor nuclei bound near each electron;  $N_e$  is the unpaired electron concentration;  $N_p$  is the total nuclear concentration;  $d_r$  is the shortest distance between the nuclear and electron spins;  $b$  is the effective tumbling radius treating solute-radical complex as a sphere;  $J_r(\omega_i)$  is the rotational spectral density function.

Under the assumption that rotational dipolar interaction dominates DNP enhancement, then the coupling factor can be expressed as:

$$\rho = (W_2^D + W_0^D)/(W_2^D + W_0^D + 2W_1^D) \quad (\text{S4})$$

By relating eq. S4 with eq. S1 and eq. S3, the coupling factor can be further simplified as eq. S5 for dipolar interaction dominant DNP enhancement by rotational diffusion modulation:

$$\rho = \frac{1}{1.4 + 0.6(1 + \omega_e^2\tau_r^2)} \quad (\text{S5})$$

By eq. 1 in main text, the absolute enhancement can be converted to coupling factor  $\rho$  for  $^1\text{H}$  DNP of benzene in normal solvent and SF  $\text{CO}_2$ , and the corresponding rotational correlation times can be estimated using eq. S5.

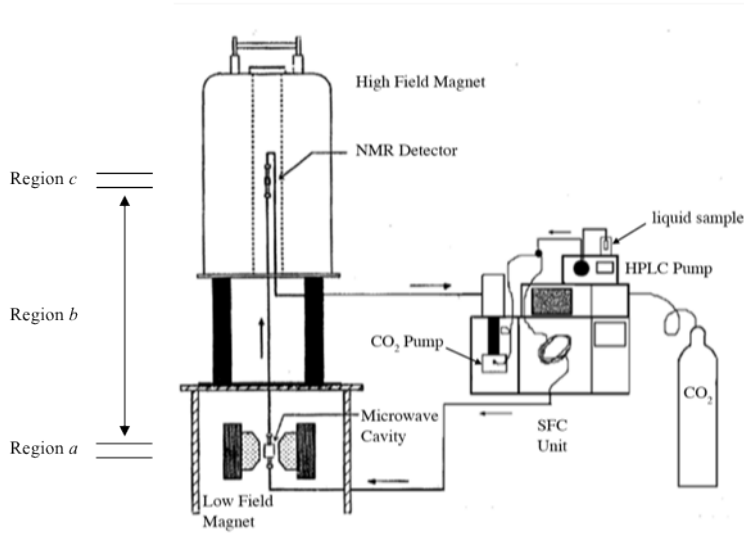

Figure S1. Schematic drawing of apparatus for continuous-flow HPLC-DNP-NMR coupled with SF  $\text{CO}_2$  from Ref. 43.

### Determination of absolute DNP enhancement in the flow DNP experiments (Model Reported in Ref. 44)

In the flow transfer DNP experiment, the nuclear spins are polarized in a low magnetic field (region *a*) and rapidly transferred via region *b*, to a high magnetic field (region *c*) where the polarization is monitored. Therefore, three separate regions (*a*, *b*, and *c* shown in Fig. S1) must be considered in calculating the enhancement factor.

The model for the DNP enhancement factor *A* with the consideration of spatial separation of the detection from the build-up of the signal enhancement is shown by eq. S6

$$A_{obs} = \frac{\langle M_Z^* \rangle - \langle M_Z^{HL} \rangle}{M_0^H} = \frac{[A(1 - E_{1a})]}{K} (E_{1b})(E_{1c}) \quad (S6)$$

$\langle M_Z^* \rangle$ : the enhanced magnetization detected at high magnetic field,

$\langle M_Z^{HL} \rangle$ : the flow magnetization from both the low and high magnetic fields with microwave off,

$M_0^H$ : the static magnetization detected in the high magnetic field,

*A*: the enhancement factor of low field DNP experiment,

*K*: the ratio of the two magnetic fields  $B_0^H/B_0^L$ ,

$E_{1a} = \exp(-t_a/T_{1a})$ ,

$E_{1b} = \exp(-t_b/T_{1b})$ ,

$E_{1c} = \exp(-t_c/T_{1c})$ ,

$t_a, t_b, t_c$ : the residence times of a given bolus in regions *a*, *b*, and *c*.

In this model, the first term on the right side of eq. S6 represents the development of the enhanced magnetization in the low magnetic field (region *a*) and the second and third terms represent the transfer losses during the sample bolus is transferred to region *b* and *c*, respectively. On the left side of eq. S6,  $M_0^H$  can be directly measured at static high field,  $\langle M_Z^* \rangle$  is the DNP enhanced magnetization experimentally measured at high field. On the other hand,  $\langle M_Z^{HL} \rangle$  can be measured at high field with field turned on but microwave irradiation turned off, so that it counts the transfer loss in region *b* and *c*. With  $M_0^H$ ,  $\langle M_Z^* \rangle$  and  $\langle M_Z^{HL} \rangle$  measured experimentally, one can obtain  $A_{obs}$  values at varied flow rates.

To describe flow experiments and estimate residence times ( $t_a, t_b, t_c$ ), assuming a simple plug flow pattern, where  $t_a = V_a/F$ ,  $t_b = V_b/F$ ,  $t_c = V_c/F$ , with *F* being the flow rate and  $V_a, V_b, V_c$  being volumes of region *a, b, c*. Then eq. S6 can be rewritten as eq. S7. By fitting a set of  $A_{obs}$  values at different flow rates, *A*,  $V_a/T_{1a}$ , and  $(V_b/T_{1b} + V_c/T_{1c})$  can be obtained.

$$A_{obs} = \left(\frac{A}{K}\right) \left(1 - \exp\left(-\frac{V_a}{T_{1a}F}\right)\right) \exp\left(-\left(\frac{V_b}{T_{1b}} + \frac{V_c}{T_{1c}}\right)\frac{1}{F}\right) \quad (S7)$$

When at low field, the bolus has developed full equilibrium magnetization, in other words, when  $T_{1a}$  is small,  $V_a/F > 5T_{1a}$  and  $E_{1a}$  in eq. S6 is negligible, eq. S7 can then be reduced to eq. S8 and eq. S9 in logarithm form. This condition is normally met at low flow rate and when  $T_{1a}$  is small. In this case, a plot of  $\ln A_{obs}$  against  $1/F$  should yield a straight line, with intercept  $\ln A/K$ .

$$A_{obs} = \left(\frac{A}{K}\right) \exp\left(-\left(\frac{V_b}{T_{1b}} + \frac{V_c}{T_{1c}}\right)\frac{1}{F}\right) \quad (S8)$$

$$\ln A_{obs} = \ln\left(\frac{A}{K}\right) - \left(\frac{V_b}{T_{1b}} + \frac{V_c}{T_{1c}}\right)\frac{1}{F} \quad (S9)$$

Subsequently, the absolute enhancement factor can be readily determined by correcting the leakage factor *f* and saturation factor *S* as in a static DNP experiment.

## Ratio Method

In this work, the DNP data of nitrobenzene and benzaldehyde systems were collected and processed by the ratio method. This method is advantageous where sample solutions cannot be readily studied by the above method due to high demand on instrument stability and experimental time.

The procedure of the ratio method is much simpler. The absolute DNP enhancement determined by the ratio method is given by eq. S10, where  $A_{\infty}^{ref}$  is the absolute DNP enhancement of the reference nucleus;  $A_I(P)$  and  $A_{ref}(P)$  are the observed DNP enhancements for the respective nucleus  $I$  and the reference nucleus measured under microwave power  $P$ ;  $f_I$  and  $f_{ref}$  are the leakage factor of the nucleus  $I$  and the reference nucleus, respectively. The  $s$  factor is assumed to be same for all the nuclei in a given experiment. In contrast to the first method, no flow rate plot or power plot is needed for extrapolation here.

$$A_{\infty}^I = A_{\infty}^{ref} \cdot \frac{A_I(P)}{A_{ref}(P)} \cdot \frac{f_{ref}}{f_I} \quad (S10)$$

Take the  $^{13}\text{C}$  DNP experiments for adamantane/benzene/0.1 M TEMPO system for example, firstly, the observed enhancements adamantane carbons,  $A_{obs}$  at different microwave powers are calculated according to eq. S6, using  $M_0^H$  and  $\langle M_z^H \rangle$ , as well as  $\langle M_z^I \rangle$  at microwave powers of 5W, 10W, 15W and 20W. Similarly, the set of observed enhancements at four microwave power values for the reference nucleus – benzene carbons are also obtained.

Next step is to convert the observed enhancements for both adamantane and benzene carbons to the enhancement factors  $A_I(P) = A_I/K$  and  $A_{ref}(P) = A_{ref}/K$  at each  $P$  values using eq. S7, so that one has the enhancement factor  $A(P)$  at each microwave power for both adamantane and benzene carbons.

Since the absolute  $^{13}\text{C}$  DNP enhancement of benzene has been determined using the first method as the reference, then at every  $P$ , one can use eq. S10 to calculate the absolute enhancement of adamantane carbons, where  $A_{\infty}^{ref}$  being  $A_{\infty}^{benzene}$ , and  $f_{ref}$  being  $f^{benzene}$ . Finally the adamantane absolute enhancements reported in this study are the average of values at all microwave powers. The results are shown in Table S1.

Table S1. Absolute  $^{13}\text{C}$  DNP Enhancements and Relaxation Data for 0.5 M Adamantane/Benzene/0.1 M TEMPO System

| Carbons             | $T_{10}/s$ | $T_1/s$ | $f$   | $-A_{\infty}^I$ | $-A_{\infty}^I$ | $-A_{\infty}^I$ | $-A_{\infty}^I$ | $-A_{\infty}^I$ |
|---------------------|------------|---------|-------|-----------------|-----------------|-----------------|-----------------|-----------------|
|                     |            |         |       | (P = 5 W)       | (P = 5 W)       | (P = 5 W)       | (P = 5 W)       | (P = 5 W)       |
| $^{-13}\text{CH}_2$ | 13.0       | 2.25    | 0.827 | 194             | 207             | 225             | 209             | 209±13          |
| $^{-13}\text{CH}$   | 20.3       | 2.64    | 0.870 | 236             | 259             | 269             | 250             | 254±14          |

### Definition of transfer efficiency

According to eq. S7, one can predict a maximum  $A_{obs}$ , with the corresponding flow rate presented by eq. S11, which can be rewritten in the form of eq. S12.

$$\begin{aligned}(F_{max})^{-1} &= \left(\frac{V_a}{T_{1a}}\right)^{-1} \ln \left( 1 + \frac{\left(\frac{V_a}{T_{1a}}\right)}{\left(\frac{V_b}{T_{1b}} + \frac{V_c}{T_{1c}}\right)} \right) \\ (F_{max})^{-1} &= \left(\frac{T_{1a}}{V_a}\right) \ln (1 + J)\end{aligned}$$

where the experimental residence time variable  $J$  is defined as:

$$J = \left(\frac{V_a}{T_{1a}}\right) / \left(\frac{V_b}{T_{1b}} + \frac{V_c}{T_{1c}}\right)$$

Therefore based on eq. S7 and eq. S13, the maximum value of  $A_{obs}$  can be written as:

$$\begin{aligned}(A_{obs})_{max} &= \left(\frac{A}{K}\right) \left(\frac{J}{J+1}\right) \exp(- (1/J) \ln (1 + J))\end{aligned}$$

The transfer efficiency  $Q$  is then defined as  $(A_{obs})_{max}$  relative to  $(A/K)$  for flow DNP experiments as a function of the experimental residence time variable  $J$ .

$$Q = \frac{K(A_{obs})_{max}}{A}$$

For most LLIT experiments presented in this work, typical values of  $J$  are in the range of 1.5 to 5, so that a 25-40% of the enhanced magnetization is monitored in the flow DNP experiments. Whereas transfer efficiencies of 80-90% are reached for SLIT experiments corresponding to  $J$  values typically on the order of 40.

Table S2. Electron Saturation factor  $s$  of Benzene/TEMPO system for LLIT  $^1\text{H}$  DNP Enhancements in  $\text{C}_6\text{D}_6$  and  $\text{SF}_6$

| system                                            | saturation factor | leakage factor |
|---------------------------------------------------|-------------------|----------------|
| 9% benzene/ $\text{C}_6\text{D}_6$ /0.001 M TEMPO | 0.68              | 0.72           |
| 9% benzene/ $\text{SF}_6$ /0.001 M TEMPO          | 0.28              | 0.57           |
| 9% benzene/ $\text{C}_6\text{D}_6$ /0.01 M TEMPO  | 0.49              | 0.93           |
| 9% benzene/ $\text{SF}_6$ /0.01 M TEMPO           | 0.21              | 0.64           |

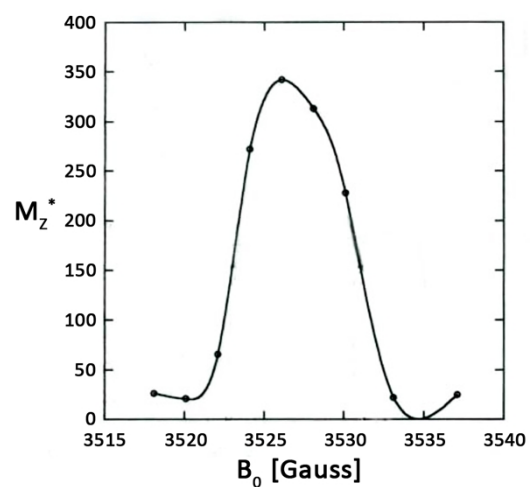

Figure S2. The EPR field plot of 9% benzene/0.001 M TEMPO in  $\text{SF}_6$  collected at 9.49 GHz and 5 W of microwave power.

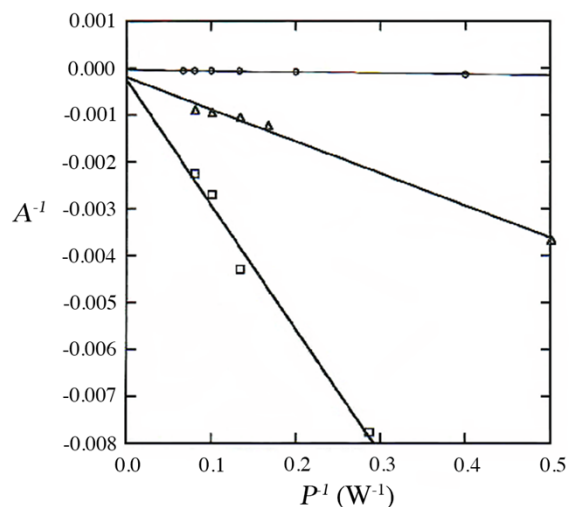

Figure S3. LLIT  $^1\text{H}$  DNP saturation plot showing the inverse enhancement versus the inverse microwave power for 9% benzene in deuterated benzene (circle), neat benzene (triangle), and 9% benzene in  $\text{SF CO}_2$  (square) in 0.001 M TEMPO. Microwave power was varied from 2 to 15 W. The value of the slope for each sample is given as follow:  $-2.5 \times 10^{-4} \text{ G}^2$ ,  $-5.9 \times 10^{-3} \text{ G}^2$ , and  $-2.7 \times 10^{-2} \text{ G}^2$  for benzene in  $\text{C}_6\text{D}_6$ ,  $\text{C}_6\text{H}_6$ , and  $\text{SF CO}_2$ , respectively.

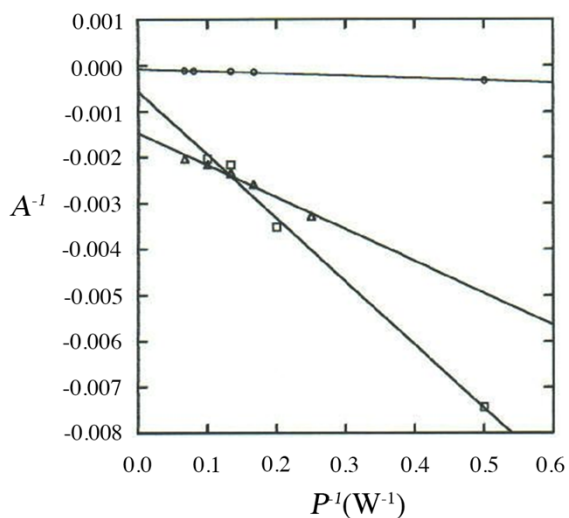

Figure S4. LLIT  $^1\text{H}$  DNP saturation plot showing the inverse enhancement versus the inverse microwave power for 9% benzene in deuterated benzene (circle), neat benzene (triangle), and 9% benzene in  $\text{SF CO}_2$  (square) in 0.01 M TEMPO. Microwave power was varied from 2 to 15 W. The value of the slope for each sample is given as follow:  $-5.0 \times 10^{-4} \text{ G}^2$ ,  $-7.0 \times 10^{-3} \text{ G}^2$ , and  $-1.4 \times 10^{-2} \text{ G}^2$  for benzene in  $\text{C}_6\text{D}_6$ ,  $\text{C}_6\text{H}_6$ , and  $\text{SF CO}_2$ , respectively.

Table S3. LLIT  $^{13}\text{C}$  DNP Enhancements and Relaxation Data and Leakage Factor for Different Carbons of  $\text{C}_{70}/\text{C}_6\text{D}_6/0.1\text{ M TEMPO}$  and  $\text{C}_{60}/\text{C}_6\text{D}_6/0.1\text{ M TEMPO}$  Systems and Angle Strain Parameters

| carbon type       | angle strain parameter / $\text{rad}^2$ | $T_{10}$ | $T_1$ | $f$   | absolute enhancement |
|-------------------|-----------------------------------------|----------|-------|-------|----------------------|
| $\text{C}_{70-1}$ | 0.0435                                  | 57.8     | 2.51  | 0.957 | -281 $\pm$ 42        |
| $\text{C}_{70-2}$ | 0.0436                                  | 54.9     | 2.44  | 0.956 | -273 $\pm$ 41        |
| $\text{C}_{70-3}$ | 0.0400                                  | 57.6     | 2.67  | 0.954 | -244 $\pm$ 37        |
| $\text{C}_{70-4}$ | 0.0308                                  | 59.7     | 2.33  | 0.940 | -182 $\pm$ 27        |
| $\text{C}_{70-5}$ | 0.0235                                  | 47.7     | 1.31  | 0.964 | -160 $\pm$ 24        |
| $\text{C}_{60}$   | 0.0423                                  | 37.1     | 3.59  | 0.903 | -250 $\pm$ 38        |

$T_1$  and  $T_{10}$  are the spin-lattice relaxation times of the carbon nuclei with and without TEMPO in the sample solution, respectively.

Table S4.  $^{13}\text{C}$  NMR Contact Shift of  $\text{C}_{70}/\text{TEMPO}/\text{ODCB}/\text{C}_6\text{H}_{12}$  and  $\text{C}_{60}/\text{TEMPO}/\text{C}_6\text{D}_6$  System

| TEMPO conc (M) | $-\Delta\delta_1$<br>(ppm) | $-\Delta\delta_2$<br>(ppm) | $-\Delta\delta_3$<br>(ppm) | $-\Delta\delta_4$<br>(ppm) | $-\Delta\delta_5$<br>(ppm) | $-\Delta\delta_6$<br>(ppm) |
|----------------|----------------------------|----------------------------|----------------------------|----------------------------|----------------------------|----------------------------|
| 0.1            | 0.15                       | 0.12                       | 0.19                       | 0.20                       | 1.21                       | 0.15                       |
| 0.2            | 0.34                       | 0.26                       | 0.33                       | 0.30                       | 1.35                       | 0.29                       |
| 0.3            | 0.50                       | 0.51                       | 0.49                       | 0.51                       | 1.53                       | 0.48                       |
| 0.4            | 0.58                       | 0.51                       | 0.58                       | 0.59                       | 1.65                       | 0.58                       |
| 0.5            | 0.80                       | 0.80                       | 0.84                       | 0.84                       | N/A*                       | 0.82                       |



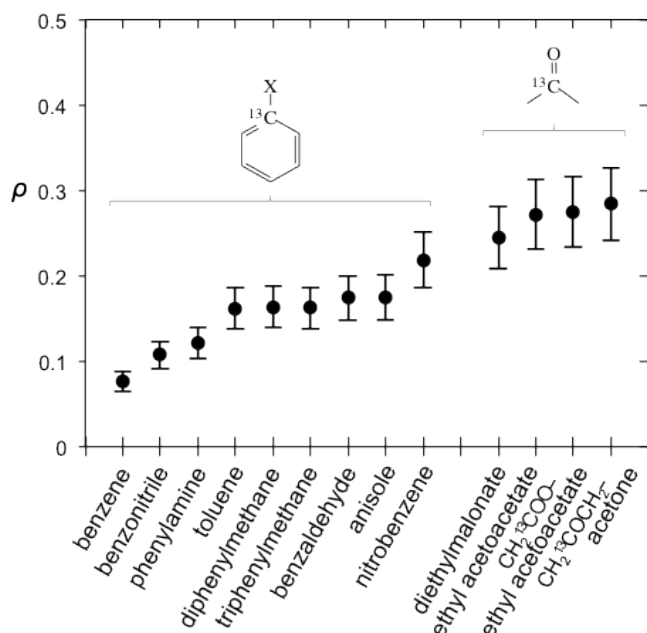

Figure S5. Coupling factor derived from dipolar dominant  $^{13}\text{C}$  LLIT DNP absolute enhancement of the indicated *ipso* carbons of substituted benzenes and carbonyls of small molecules. The relative standard deviation for  $\rho$  is about 15%.

Table S5. LLIT  $^{13}\text{C}$  DNP Enhancements for Benzene/ $\text{C}_6\text{D}_6$ /0.16 M TEMPO  $^{15}$  and  $a_{FC}$  via DFT Modeling

| Nucleus               | Enhancement   | $a_{FC}$ (MHz) |       |       |        |        |
|-----------------------|---------------|----------------|-------|-------|--------|--------|
|                       |               | Average        | 1     | 2     | 3      | 4      |
| $^{13}\text{C}$       | $-220 \pm 33$ | 0.802          | 0.025 | 0.160 | 0.731  | 0.021  |
|                       |               |                | 0.263 | 1.896 | 0.107  | 0.129  |
|                       |               |                | 1.046 | 0.163 | -0.045 | -0.127 |
|                       |               |                | 0.609 | 0.146 | 0.057  | 0.306  |
|                       |               |                | 0.120 | 0.029 | 0.862  | 1.658  |
|                       |               |                | 0.002 | 0.145 | 3.854  | 0.171  |
| $\Delta G$ (kcal/mol) |               |                | 0.00  | 0.09  | 0.17   | 3.83   |

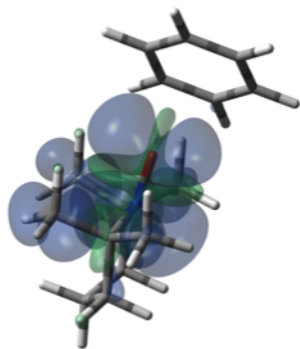

Figure S6. Interacting orientation 1 of benzene/TEMPO

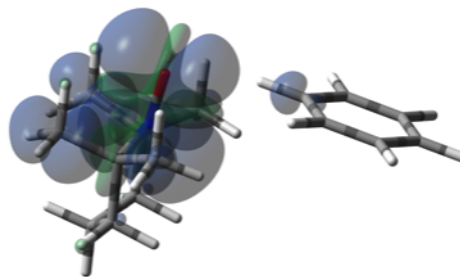

Figure S7. Interacting orientation 2 of benzene/TEMPO (Figure 12 in main text)

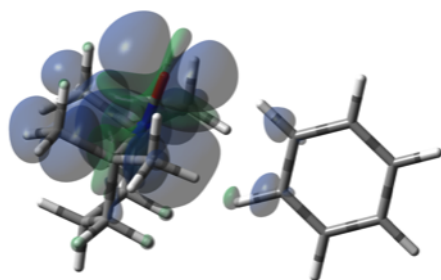

Figure S8. Interacting orientation 3 of benzene/TEMPO (Figure 11 in main text)

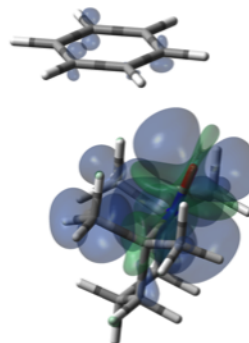

Figure S9. Interacting orientation 4 of benzene/TEMPO

Table S6. LLIT  $^{13}\text{C}$  DNP Enhancements for Phenylacetylene/0.001 M TEMPO and  $a_{FC}$  via DFT Modeling

| Nucleus                | Enhancement | $a_{FC}$ (MHz) |        |        |        |        |        |        |
|------------------------|-------------|----------------|--------|--------|--------|--------|--------|--------|
|                        |             | Average        | 5      | 6      | 7      | 8      | 9      | 10     |
| $^{13}\text{C-}\beta$  | +1400±210   | 3.281          | 0.256  | 15.249 | -0.001 | -0.031 | 0.066  | 0.043  |
| $^{13}\text{C-}\alpha$ | +290±44     | 0.871          | 0.727  | 2.722  | 0.028  | 0.063  | -0.105 | -0.026 |
| $^{13}\text{C-Ipso}$   | -280±42     | 0.277          | 0.540  | 0.227  | -0.004 | -0.162 | 0.195  | 0.200  |
| $^{13}\text{C-Ortho}$  | -36±5       | 0.579          | 2.493  | -0.082 | 0.124  | 0.173  | 0.313  | 1.526  |
|                        |             |                | -0.019 | -0.114 | 0.039  | 0.259  | -0.100 | 0.040  |
| $^{13}\text{C-Meta}$   | -32±5       | 0.117          | -0.104 | 0.021  | 0.554  | -0.111 | 0.240  | 0.484  |
|                        |             |                | 0.028  | 0.010  | 0.299  | 0.836  | 0.172  | 0.099  |
| $^{13}\text{C-Para}$   | N/A         | 0.181          | 0.005  | -0.023 | 1.245  | -0.061 | 0.288  | -0.058 |
| $\Delta G$ (kcal/mol)  |             |                | 0.00   | 0.41   | 0.65   | 0.77   | 1.04   | 1.25   |

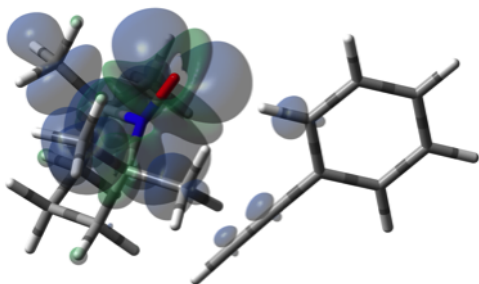

Figure S10. Interacting orientation 5 of phenylacetylene/TEMPO

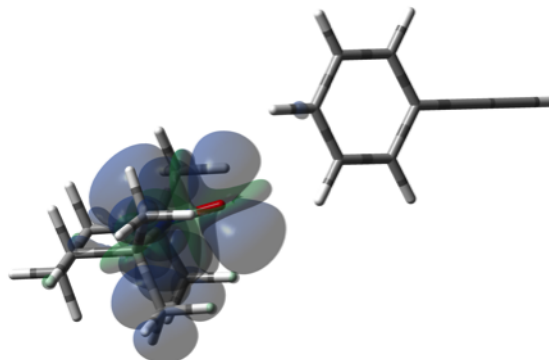

Figure S11. Interacting orientation 7 of benzene/TEMPO

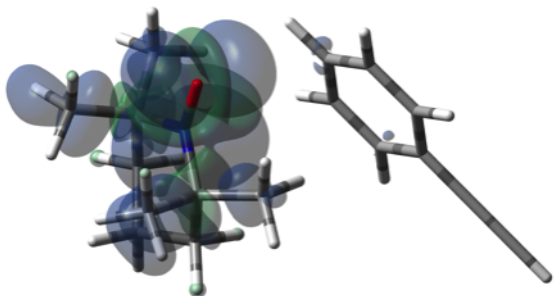

Figure S12. Interacting orientation 8 of phenylacetylene/TEMPO

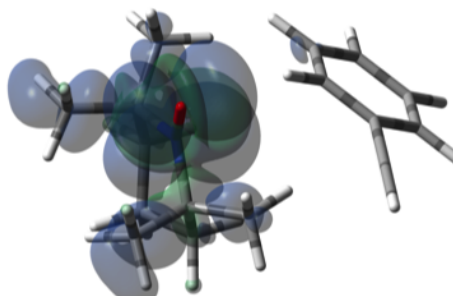

Figure S13. Interacting orientation 9 of benzene/TEMPO

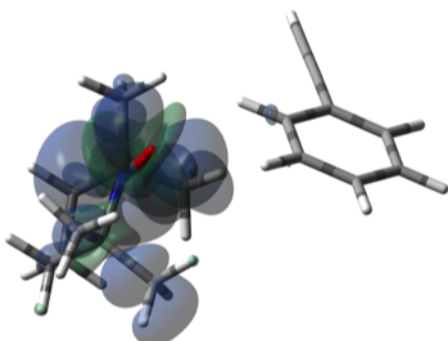

Figure S14. Interacting orientation 10 of benzaldehyde/TEMPO

Table S7. LLIT  $^{13}\text{C}$  DNP Enhancements for Benzaldehyde/Cyclohexane/0.1 M TEMPO and  $a_{FC}$  via DFT Modeling

| Nucleus                  | Enhancement | $a_{FC}$ (MHz) |        |        |        |        |        |       |        |
|--------------------------|-------------|----------------|--------|--------|--------|--------|--------|-------|--------|
|                          |             | Average        | 11     | 12     | 13     | 14     | 15     | 16    | 17     |
| $^{13}\text{CHO-}$       | +373±56     | 1.155          | -0.356 | 1.294  | -0.178 | 7.506  | 0.027  | 0.003 | 0.016  |
| $^{13}\text{C-Ipso}$     | -456±20     | 0.284          | 0.731  | -0.003 | -0.083 | 0.277  | 0.149  | 0.147 | -0.035 |
| $^{13}\text{C-Ortho}$    | +131±20     | 0.442          | 1.532  | 0.173  | 0.178  | 1.580  | 0.158  | 0.083 | 0.048  |
|                          |             |                | -0.219 | 0.229  | 0.204  | -0.158 | -0.038 | 0.785 | 0.240  |
| $^{13}\text{C-Meta}$     | +93±14      | 0.063          | 0.206  | -0.237 | 0.010  | -0.140 | 2.632  | 0.079 | -0.135 |
|                          |             |                | 0.231  | -0.237 | 0.050  | 0.156  | 0.183  | 0.567 | 0.405  |
| $^{13}\text{C-Para}$     | +78±12      | 0.099          | -0.154 | 0.267  | -0.026 | 0.120  | 0.177  | 0.118 | 2.320  |
| $\Delta G$<br>(kcal/mol) |             |                | 0.00   | 0.10   | 0.50   | 0.62   | 1.48   | 1.57  | 1.60   |

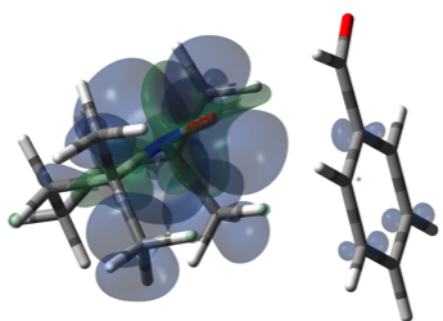

Figure S15. Interacting orientation 11 of benzaldehyde/ TEMPO

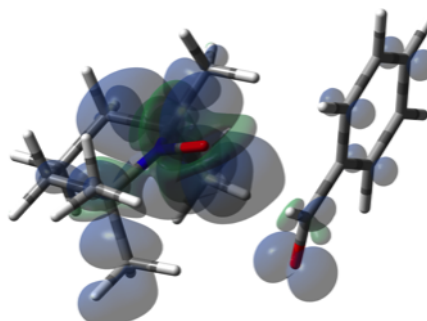

Figure S16. Interacting orientation 12 of benzaldehyde/ TEMPO

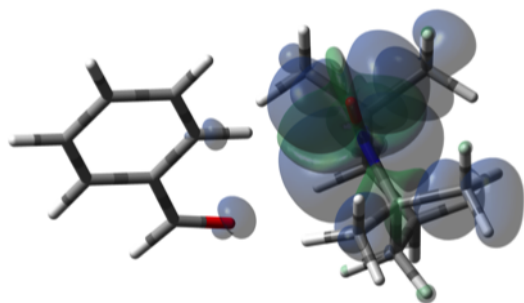

Figure S17. Interacting orientation 13 of benzaldehyde/ TEMPO

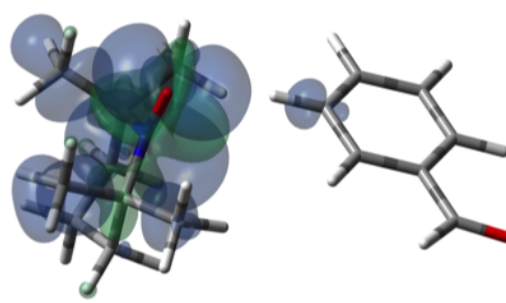

Figure S18. Interacting orientation 15 of benzaldehyde/ TEMPO

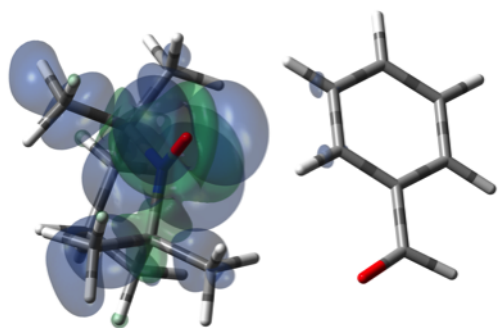

Figure S19. Interacting orientation 16 of benzaldehyde/ TEMPO

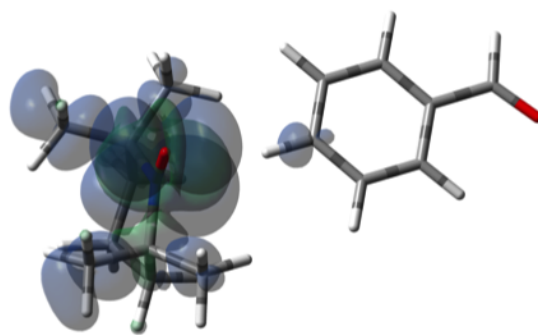

Figure S20. Interacting orientation 17 of benzaldehyde/ TEMPO

Table S8. LLIT  $^{13}\text{C}$  DNP Enhancements for Nitrobenzene/Cyclohexane/0.1 M TEMPO and  $a_{FC}$  via DFT Modeling

| Nucleus                | Enhancement   | $a_{FC}$ (MHz) |        |        |        |       |       |       |
|------------------------|---------------|----------------|--------|--------|--------|-------|-------|-------|
|                        |               | Average        | 18     | 19     | 20     | 21    | 22    | 23    |
| $^{13}\text{C}$ -Ipsa  | $-572 \pm 86$ | 0.399          | 0.792  | 0.176  | 0.601  | 0.040 | 0.138 | 0.036 |
| $^{13}\text{C}$ -Ortho | $+587 \pm 88$ | 1.424          | 6.549  | 1.816  | 0.801  | 0.218 | 0.901 | 0.029 |
|                        |               |                | 0.112  | 0.024  | 0.476  | 0.035 | 0.048 | 0.007 |
| $^{13}\text{C}$ -Meta  | $+198 \pm 30$ | 0.329          | 1.638  | -0.070 | -0.436 | 1.174 | 0.743 | 0.958 |
|                        |               |                | -0.077 | 0.030  | -0.403 | 0.340 | 0.107 | 0.027 |
| $^{13}\text{C}$ -Para  | $+366 \pm 55$ | 0.418          | 0.558  | -0.022 | 0.490  | 1.253 | 0.166 | 0.006 |
| $\Delta G$ (kcal/mol)  |               |                | 0.00   | 0.05   | 0.42   | 0.49  | 0.85  | 1.01  |

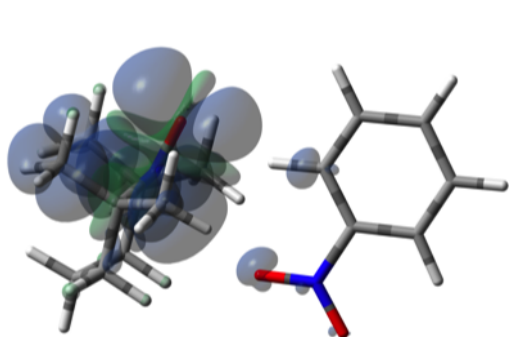

Figure S21. Interacting orientation 19 of nitrobenzene/ TEMPO

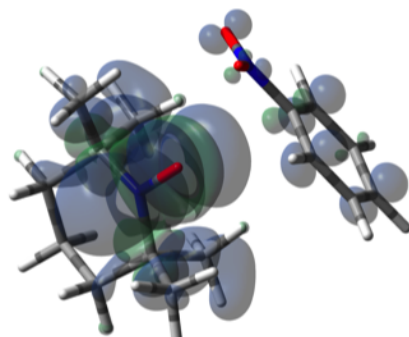

Figure S22. Interacting orientation 20 of nitrobenzene/ TEMPO

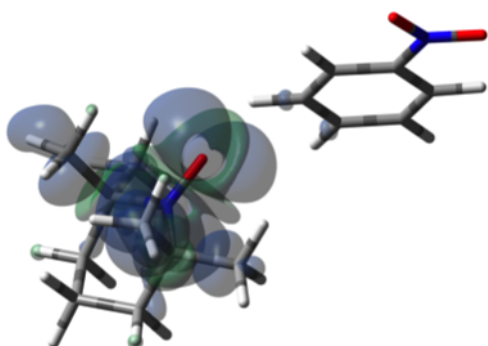

Figure S23. Interacting orientation 21 of nitrobenzene/ TEMPO

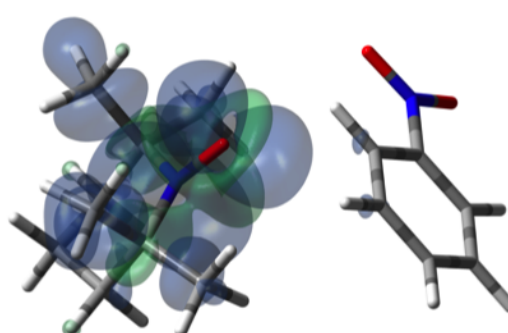

Figure S24. Interacting orientation 22 of nitrobenzene/ TEMPO

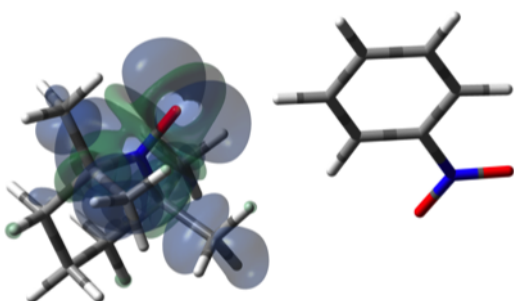

Figure S25. Interacting orientation 23 of nitrobenzene/ TEMPO

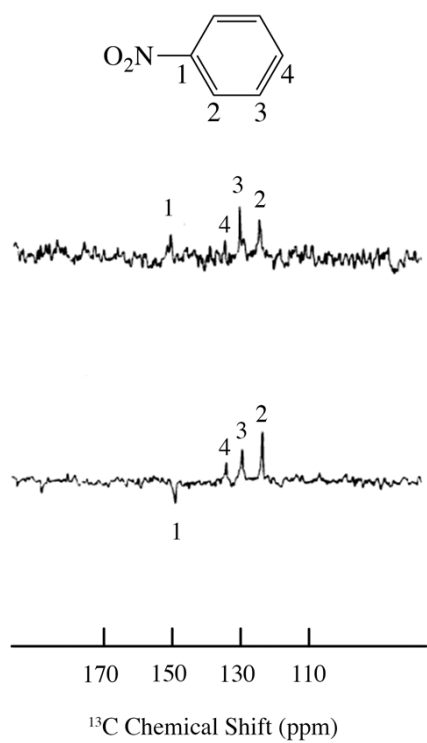

Figure S26.  $^{13}\text{C}$  spectra of nitrobenzene/TEMPO in cyclohexane at 4.7 T (a) 0.1 M TEMPO without flow DNP, (b) 0.1 M TEMPO with flow DNP (a) 100 scans; (b) 100 scans.

Table S9. LLIT  $^{13}\text{C}$  DNP Enhancements for Benzonitrile/Cyclohexane/0.1 M TEMPO

| system       | nucleus                | absolute enhancement |
|--------------|------------------------|----------------------|
| benzonitrile | $^{13}\text{CN}$ -     | $-204 \pm 31$        |
|              | $^{13}\text{C}$ -ipso  | $-281 \pm 42$        |
|              | $^{13}\text{C}$ -ortho | $+171 \pm 26$        |
|              | $^{13}\text{C}$ -meta  | $+98 \pm 15$         |
|              | $^{13}\text{C}$ -para  | $+22 \pm 2$          |

Table S10. LLIT <sup>13</sup>C DNP Enhancements for Phenylamine/Cyclohexane/0.1 M TEMPO

| system      | nucleus                       | absolute enhancement |
|-------------|-------------------------------|----------------------|
| phenylamine | <sup>13</sup> C- <i>ipso</i>  | -318±48              |
|             | <sup>13</sup> C- <i>ortho</i> | -22±2                |
|             | <sup>13</sup> C- <i>meta</i>  | -131±20              |
|             | <sup>13</sup> C- <i>para</i>  | -145±22              |

Table S11. LLIT <sup>13</sup>C DNP Enhancements for Anisole/Cyclohexane/0.1 M TEMPO

| system  | nucleus                           | absolute enhancement |
|---------|-----------------------------------|----------------------|
| anisole | O <sup>13</sup> CH <sub>3</sub> - | +266±31              |
|         | <sup>13</sup> C- <i>ipso</i>      | -457±69              |
|         | <sup>13</sup> C- <i>ortho</i>     | -42±6                |
|         | <sup>13</sup> C- <i>meta</i>      | -61±9                |
|         | <sup>13</sup> C- <i>para</i>      | -64±10               |

Table S12. LLIT <sup>13</sup>C DNP Enhancements for Toluene/Cyclohexane/0.1 M TEMPO

| system  | nucleus                         | absolute enhancement |
|---------|---------------------------------|----------------------|
| toluene | <sup>13</sup> CH <sub>3</sub> - | -187±28              |
|         | <sup>13</sup> C- <i>ipso</i>    | -562±84              |
|         | <sup>13</sup> C- <i>ortho</i>   | -179±27              |
|         | <sup>13</sup> C- <i>meta</i>    | -153±23              |
|         | <sup>13</sup> C- <i>para</i>    | -207±31              |

Table S13. LLIT <sup>13</sup>C DNP Enhancements for Diethyl malonate/Benzene/Cyclohexane/0.1 M TEMPO

| system           | nucleus            | absolute enhancement |
|------------------|--------------------|----------------------|
| diethyl malonate | <sup>13</sup> C-1  | -642±96              |
|                  | <sup>13</sup> C-2  | +401±60              |
|                  | <sup>13</sup> C-1' | +86±13               |
|                  | <sup>13</sup> C-2' | -97±14               |

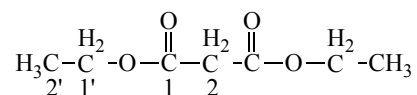Table S14. LLIT <sup>13</sup>C DNP Enhancements for Ethyl acetoacetate/Benzene/Cyclohexane/0.1 M TEMPO

| system             | nucleus            | absolute enhancement |
|--------------------|--------------------|----------------------|
| ethyl acetoacetate | <sup>13</sup> C-1  | -711±107             |
|                    | <sup>13</sup> C-2  | +440±66              |
|                    | <sup>13</sup> C-3  | -720±108             |
|                    | <sup>13</sup> C-4  | +73±11               |
|                    | <sup>13</sup> C-1' | +250±38              |
|                    | <sup>13</sup> C-2' | -117±18              |



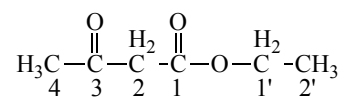

Table S15. LLIT  $^{13}\text{C}$  DNP Enhancements for Acetone/Carbon tetrachloride/Cyclohexane/0.1 M TEMPO

| system  | nucleus             | absolute enhancement |
|---------|---------------------|----------------------|
| acetone | $^{-13}\text{CO-}$  | $-84\pm 13$          |
|         | $^{13}\text{CH}_3-$ | $-744\pm 112$        |

Table S16. LLIT  $^{13}\text{C}$  DNP Enhancements for Acetonitrile/Carbon tetrachloride/0.1 M TEMPO

| system       | nucleus             | absolute enhancement |
|--------------|---------------------|----------------------|
| acetonitrile | $^{13}\text{CH}_3-$ | $+520\pm 100$        |
|              | $^{13}\text{CN-}$   | $-620\pm 120$        |

**XYZ Coordinates of Phenyl acetylene/TEMPO, Benzaldehyde/TEMPO, and Nitrobenzene/TEMPO systems.**

**Orientation #5**

phenylacetylene/bite-orthometa/phenylacetylene-tempo-bite-orthometa.freq.out

C -4.754403 -1.200578 0.000110  
C -3.413655 -1.585041 -0.000026  
C -2.402665 -0.628710 -0.000133  
C -2.731181 0.740333 -0.000104  
C -4.087367 1.120713 0.000029  
C -5.087346 0.154859 0.000137  
H -5.542373 -1.957332 0.000190  
H -3.145891 -2.643984 -0.000050  
H -1.355521 -0.942381 -0.000251  
H -4.342310 2.182544 0.000044  
H -6.135644 0.462184 0.000234  
C -1.713248 1.738418 -0.000226  
C 1.899014 -0.244690 -1.324793  
C 2.420871 1.190285 -1.234489  
C 3.259585 1.451286 -0.000084  
C 2.420815 1.190507 1.234329  
C 1.898959 -0.244455 1.324874  
H 2.979130 1.409000 -2.158857  
H 4.164084 0.818819 -0.000002  
H 3.627701 2.488500 -0.000166  
H 2.979033 1.409400 2.158680  
H 1.555605 1.876041 1.230067  
H 1.555665 1.875826 -1.230397  
C 3.005250 -1.220397 -1.729933  
H 2.639035 -2.252733 -1.647627  
H 3.308030 -1.044305 -2.772051  
H 3.902816 -1.125363 -1.103288  
C 0.757793 -0.315454 -2.330708  
H 1.108279 0.026389 -3.314634  
H 0.380340 -1.340065 -2.430214  
H -0.076678 0.330869 -2.022102  
C 3.005179 -1.220079 1.730249  
H 3.307835 -1.043838 2.772377  
H 2.638989 -2.252433 1.648049  
H 3.902817 -1.125110 1.103695  
C 0.757692 -0.315036 2.330765  
H 0.380315 -1.339646 2.430559  
H 1.108095 0.027142 3.314604  
H -0.076823 0.331118 2.021917  
N 1.350228 -0.678012 0.000075  
O 0.699045 -1.769467 0.000157  
C -0.864323 2.610853 -0.000346  
H -0.132316 3.394304 -0.000461

**Orientation #6**

phenylacetylene/rcontact/phenylacetylene-tempo-rcontact.freq.out

C 6.501361 -0.189869 0.653996  
C 5.551680 -1.138868 1.034059  
C 4.238857 -1.037618 0.585975  
C 3.851179 0.022246 -0.255957  
C 4.818504 0.973618 -0.632782  
C 6.128999 0.864823 -0.180133

|   |           |           |           |
|---|-----------|-----------|-----------|
| H | 7.531594  | -0.272641 | 1.007442  |
| H | 5.837208  | -1.967442 | 1.686379  |
| H | 3.494085  | -1.779490 | 0.881349  |
| H | 4.524401  | 1.797512  | -1.286106 |
| H | 6.867960  | 1.610756  | -0.481767 |
| C | 2.508339  | 0.132447  | -0.718954 |
| C | -2.673368 | 1.306758  | 0.315628  |
| C | -3.914886 | 1.028884  | 1.166052  |
| C | -3.978430 | -0.389514 | 1.694506  |
| C | -3.992083 | -1.356646 | 0.528597  |
| C | -2.757211 | -1.246802 | -0.368903 |
| H | -3.941506 | 1.767053  | 1.983392  |
| H | -3.125404 | -0.595773 | 2.363226  |
| H | -4.877368 | -0.526107 | 2.314029  |
| H | -4.075217 | -2.400934 | 0.869499  |
| H | -4.890694 | -1.164050 | -0.082985 |
| H | -4.812829 | 1.221045  | 0.553330  |
| C | -1.419026 | 1.433346  | 1.182009  |
| H | -0.519943 | 1.490736  | 0.552922  |
| H | -1.468528 | 2.351437  | 1.784889  |
| H | -1.292792 | 0.591071  | 1.875339  |
| C | -2.868664 | 2.587538  | -0.483693 |
| H | -3.086743 | 3.419500  | 0.200184  |
| H | -1.972215 | 2.836485  | -1.062679 |
| H | -3.708638 | 2.490921  | -1.185211 |
| C | -1.525714 | -1.864987 | 0.295558  |
| H | -1.640109 | -2.956635 | 0.359788  |
| H | -0.623392 | -1.653716 | -0.294813 |
| H | -1.358462 | -1.490722 | 1.314394  |
| C | -3.018741 | -1.941723 | -1.697889 |
| H | -2.131058 | -1.920438 | -2.340083 |
| H | -3.297057 | -2.989443 | -1.518278 |
| H | -3.841062 | -1.456788 | -2.241604 |
| N | -2.478361 | 0.194335  | -0.668849 |
| O | -1.684815 | 0.426271  | -1.632976 |
| C | 1.364837  | 0.233744  | -1.125024 |
| H | 0.341019  | 0.322889  | -1.465155 |

#### Orientation #7

phenylacetylene/para/phenylacetylene-tempo-paraCH.freq.out

|   |           |           |           |
|---|-----------|-----------|-----------|
| C | 2.220912  | 0.989135  | -0.748176 |
| C | 2.340055  | 0.395267  | 0.509680  |
| C | 3.571190  | -0.080239 | 0.947711  |
| C | 4.710854  | 0.030761  | 0.127754  |
| C | 4.579916  | 0.631650  | -1.138377 |
| C | 3.344001  | 1.105287  | -1.567643 |
| H | 1.242855  | 1.351981  | -1.072368 |
| H | 1.452438  | 0.310839  | 1.140896  |
| H | 3.669885  | -0.544222 | 1.931471  |
| H | 5.460980  | 0.720407  | -1.777422 |
| H | 3.257969  | 1.570092  | -2.552805 |
| C | 5.974178  | -0.456384 | 0.571748  |
| C | -3.214391 | 0.981036  | 0.355988  |

|   |           |           |           |
|---|-----------|-----------|-----------|
| C | -4.411143 | 0.346786  | -0.355389 |
| C | -4.404190 | -1.167580 | -0.314433 |
| C | -3.143330 | -1.678378 | -0.981131 |
| C | -1.858068 | -1.188101 | -0.311155 |
| H | -5.331291 | 0.760156  | 0.087688  |
| H | -4.471121 | -1.531056 | 0.725298  |
| H | -5.294137 | -1.567293 | -0.823096 |
| H | -3.116451 | -2.779390 | -1.007873 |
| H | -3.139337 | -1.349152 | -2.034793 |
| H | -4.408608 | 0.673585  | -1.409768 |
| C | -3.354885 | 0.897599  | 1.877108  |
| H | -2.418719 | 1.216020  | 2.355674  |
| H | -4.159676 | 1.562035  | 2.222868  |
| H | -3.591004 | -0.116164 | 2.227785  |
| C | -3.076902 | 2.439004  | -0.060292 |
| H | -4.006433 | 2.979281  | 0.166854  |
| H | -2.249529 | 2.925990  | 0.468126  |
| H | -2.886671 | 2.524033  | -1.139099 |
| C | -1.605149 | -1.911675 | 1.012730  |
| H | -1.345018 | -2.963563 | 0.826989  |
| H | -0.765019 | -1.442701 | 1.543162  |
| H | -2.478610 | -1.899983 | 1.678501  |
| C | -0.673046 | -1.408790 | -1.241242 |
| H | 0.274236  | -1.139491 | -0.759130 |
| H | -0.624600 | -2.466915 | -1.533888 |
| H | -0.770759 | -0.805780 | -2.154966 |
| N | -1.951890 | 0.283953  | -0.049875 |
| O | -0.869247 | 0.867994  | 0.267017  |
| C | 7.052239  | -0.872379 | 0.951300  |
| H | 8.002375  | -1.238332 | 1.285808  |

#### Orientation #8

phenylacetylene/meta/phenylacetylene-tempo-metaCH.freq.out

|   |           |           |           |
|---|-----------|-----------|-----------|
| C | -1.436350 | -1.947392 | 0.216167  |
| C | -2.323578 | -1.627433 | 1.243581  |
| C | -3.354812 | -0.720213 | 1.026074  |
| C | -3.513392 | -0.109850 | -0.233130 |
| C | -2.613587 | -0.439876 | -1.264430 |
| C | -1.587422 | -1.351828 | -1.036579 |
| H | -0.614891 | -2.641042 | 0.404448  |
| H | -2.200072 | -2.081863 | 2.229008  |
| H | -4.048439 | -0.465407 | 1.829992  |
| H | -2.733380 | 0.028386  | -2.243831 |
| H | -0.899312 | -1.599742 | -1.849464 |
| C | -4.561612 | 0.828308  | -0.458954 |
| C | 2.549249  | -0.714920 | -0.444263 |
| C | 2.473098  | 0.097829  | -1.738152 |
| C | 2.411277  | 1.594084  | -1.507717 |
| C | 1.192036  | 1.922788  | -0.670223 |
| C | 1.186895  | 1.234886  | 0.695962  |
| H | 3.332018  | -0.179912 | -2.370218 |
| H | 3.332049  | 1.950834  | -1.014992 |
| H | 2.369042  | 2.126147  | -2.469960 |

|   |           |           |           |
|---|-----------|-----------|-----------|
| H | 1.093046  | 3.008174  | -0.508997 |
| H | 0.285816  | 1.612444  | -1.219813 |
| H | 1.571871  | -0.212682 | -2.295613 |
| C | 3.933420  | -0.620283 | 0.201826  |
| H | 3.907053  | -1.067167 | 1.205192  |
| H | 4.672453  | -1.170327 | -0.398385 |
| H | 4.291653  | 0.413178  | 0.296318  |
| C | 2.236435  | -2.176411 | -0.732262 |
| H | 2.948107  | -2.569962 | -1.471244 |
| H | 2.304443  | -2.783293 | 0.178173  |
| H | 1.224131  | -2.290303 | -1.143435 |
| C | 2.197425  | 1.868304  | 1.654871  |
| H | 1.859370  | 2.870831  | 1.953925  |
| H | 2.285860  | 1.253802  | 2.561402  |
| H | 3.198014  | 1.976994  | 1.215997  |
| C | -0.203170 | 1.318937  | 1.308319  |
| H | -0.233543 | 0.836860  | 2.292486  |
| H | -0.491999 | 2.373044  | 1.422903  |
| H | -0.948188 | 0.829727  | 0.666809  |
| N | 1.520966  | -0.218181 | 0.527765  |
| O | 1.289326  | -0.967742 | 1.525868  |
| C | -5.456075 | 1.629167  | -0.652619 |
| H | -6.245489 | 2.333893  | -0.822807 |

#### Orientation #9

phenylacetylene/ring/phenylacetylene-tempo-ring.freq.out

|   |           |           |           |
|---|-----------|-----------|-----------|
| C | 2.000319  | -2.301201 | 0.601917  |
| C | 1.763127  | -1.704511 | -0.635911 |
| C | 2.462061  | -0.561882 | -1.008940 |
| C | 3.417553  | 0.001213  | -0.143933 |
| C | 3.652012  | -0.609592 | 1.103323  |
| C | 2.946082  | -1.750208 | 1.469653  |
| H | 1.446941  | -3.197466 | 0.894178  |
| H | 1.011660  | -2.111552 | -1.315049 |
| H | 2.250605  | -0.079977 | -1.964971 |
| H | 4.390429  | -0.174041 | 1.779648  |
| H | 3.134017  | -2.213992 | 2.440780  |
| C | 4.116326  | 1.187219  | -0.511956 |
| C | -2.524447 | -0.779208 | -0.498197 |
| C | -3.109080 | -0.904155 | 0.909652  |
| C | -3.252639 | 0.425017  | 1.621833  |
| C | -1.887356 | 1.069832  | 1.744816  |
| C | -1.210719 | 1.332115  | 0.397791  |
| H | -4.073321 | -1.432239 | 0.835046  |
| H | -3.951221 | 1.085601  | 1.080417  |
| H | -3.697699 | 0.279039  | 2.617506  |
| H | -1.936987 | 2.024261  | 2.292891  |
| H | -1.235300 | 0.409365  | 2.342668  |
| H | -2.449638 | -1.557133 | 1.507803  |
| C | -3.546437 | -0.211143 | -1.484526 |
| H | -3.056013 | 0.006896  | -2.443076 |
| H | -4.349691 | -0.939524 | -1.666760 |
| H | -4.015184 | 0.713845  | -1.122865 |

|   |           |           |           |
|---|-----------|-----------|-----------|
| C | -2.058555 | -2.144813 | -0.983195 |
| H | -2.900930 | -2.850566 | -0.976035 |
| H | -1.658115 | -2.087799 | -2.002438 |
| H | -1.272822 | -2.544964 | -0.327087 |
| C | -1.843819 | 2.520415  | -0.328082 |
| H | -1.604195 | 3.457688  | 0.194282  |
| H | -1.445424 | 2.586334  | -1.349725 |
| H | -2.938282 | 2.448136  | -0.391112 |
| C | 0.271983  | 1.599541  | 0.612799  |
| H | 0.779398  | 1.830787  | -0.331820 |
| H | 0.399709  | 2.452664  | 1.294103  |
| H | 0.767898  | 0.726947  | 1.061558  |
| N | -1.325149 | 0.119325  | -0.476729 |
| O | -0.618771 | 0.124390  | -1.532053 |
| C | 4.704479  | 2.204405  | -0.825828 |
| H | 5.225045  | 3.099032  | -1.103720 |

#### Orientation #10

phenylacetylene/ortho/phenylacetylene-tempo-orthoCH.freq.out

|   |           |           |           |
|---|-----------|-----------|-----------|
| C | -3.451624 | -2.301647 | 0.165964  |
| C | -2.452213 | -1.711955 | -0.608729 |
| C | -2.378686 | -0.327629 | -0.724522 |
| C | -3.303050 | 0.491637  | -0.049806 |
| C | -4.307634 | -0.112030 | 0.730206  |
| C | -4.378540 | -1.497448 | 0.831737  |
| H | -3.509609 | -3.389198 | 0.253131  |
| H | -1.713802 | -2.325392 | -1.130587 |
| H | -1.583810 | 0.121166  | -1.322544 |
| H | -5.027338 | 0.519891  | 1.254755  |
| H | -5.163165 | -1.954650 | 1.439098  |
| C | -3.205945 | 1.910381  | -0.146189 |
| C | 2.503417  | -1.181294 | -0.056150 |
| C | 3.812670  | -0.581327 | 0.462194  |
| C | 3.618164  | 0.677119  | 1.283417  |
| C | 2.913195  | 1.723794  | 0.444172  |
| C | 1.540467  | 1.273421  | -0.060937 |
| H | 4.344569  | -1.358642 | 1.034077  |
| H | 3.042047  | 0.459738  | 2.199051  |
| H | 4.589783  | 1.058163  | 1.632036  |
| H | 2.781535  | 2.665284  | 1.001086  |
| H | 3.545960  | 1.970024  | -0.426370 |
| H | 4.456763  | -0.345685 | -0.402807 |
| C | 1.720055  | -1.877086 | 1.059116  |
| H | 0.713191  | -2.139119 | 0.705059  |
| H | 2.228851  | -2.804223 | 1.360269  |
| H | 1.612082  | -1.254841 | 1.957244  |
| C | 2.798693  | -2.181440 | -1.165441 |
| H | 3.486354  | -2.953935 | -0.793796 |
| H | 1.882080  | -2.667841 | -1.517902 |
| H | 3.270122  | -1.687407 | -2.026059 |
| C | 0.506828  | 1.260896  | 1.067247  |
| H | 0.245643  | 2.289879  | 1.353394  |
| H | -0.414886 | 0.763239  | 0.735717  |

|   |           |           |           |
|---|-----------|-----------|-----------|
| H | 0.865213  | 0.748320  | 1.969702  |
| C | 1.065940  | 2.202753  | -1.169623 |
| H | 0.048327  | 1.957482  | -1.495145 |
| H | 1.067461  | 3.239626  | -0.805088 |
| H | 1.727081  | 2.144250  | -2.045098 |
| N | 1.654735  | -0.099751 | -0.648838 |
| O | 0.695920  | -0.484168 | -1.388041 |
| C | -3.104884 | 3.120054  | -0.226208 |
| H | -3.026073 | 4.186270  | -0.301700 |

#### Orientation #11

benzaldehyde/ring/benzaldehyde-tempo-ring.freq.out

|   |           |           |           |
|---|-----------|-----------|-----------|
| C | 3.207391  | -1.841368 | -1.208712 |
| C | 2.590012  | -2.157245 | 0.003492  |
| C | 2.322058  | -1.149450 | 0.925873  |
| C | 2.661722  | 0.177383  | 0.637367  |
| C | 3.282190  | 0.487820  | -0.579809 |
| C | 3.555922  | -0.519303 | -1.499153 |
| H | 3.419788  | -2.631546 | -1.932969 |
| H | 1.823044  | -1.373514 | 1.873362  |
| C | -2.386816 | -0.669574 | 0.793566  |
| C | -3.672459 | -0.344042 | 0.029836  |
| C | -3.444970 | -0.041093 | -1.436952 |
| C | -2.503954 | 1.139524  | -1.566583 |
| C | -1.137951 | 0.902289  | -0.919252 |
| H | -4.374284 | -1.182508 | 0.166027  |
| H | -3.037239 | -0.923717 | -1.958907 |
| H | -4.402319 | 0.176505  | -1.933594 |
| H | -2.339368 | 1.410562  | -2.621760 |
| H | -2.969456 | 2.022212  | -1.094500 |
| H | -4.149182 | 0.531269  | 0.503929  |
| C | -1.868245 | -2.069338 | 0.457052  |
| H | -0.867723 | -2.211675 | 0.889188  |
| H | -2.535204 | -2.834619 | 0.879598  |
| H | -1.800526 | -2.250829 | -0.623898 |
| C | -2.638628 | -0.570387 | 2.291940  |
| H | -3.463223 | -1.240057 | 2.574021  |
| H | -1.747845 | -0.850370 | 2.865468  |
| H | -2.915485 | 0.453638  | 2.577535  |
| C | -0.285304 | -0.062521 | -1.746032 |
| H | 0.064306  | 0.432883  | -2.663822 |
| H | 0.599218  | -0.369983 | -1.171695 |
| H | -0.830347 | -0.967391 | -2.047050 |
| C | -0.399252 | 2.224577  | -0.767476 |
| H | 0.625306  | 2.083088  | -0.403876 |
| H | -0.350382 | 2.729849  | -1.742250 |
| H | -0.916229 | 2.889644  | -0.062585 |
| N | -1.329720 | 0.334786  | 0.453421  |
| O | -0.319342 | 0.358697  | 1.223591  |
| H | 2.317271  | -3.192070 | 0.224629  |
| H | 4.040596  | -0.279705 | -2.448601 |
| C | 2.349053  | 1.249827  | 1.606639  |
| O | 2.556071  | 2.425256  | 1.408522  |

H 1.903070 0.887934 2.568942  
H 3.535812 1.532683 -0.778812

**Orientation #12**

benzaldehyde/ortho/benzaldehyde-tempo-ortho.freq.out

C -4.299646 1.111616 -0.489090  
C -3.786062 0.292274 -1.496433  
C -2.888994 -0.721305 -1.172906  
C -2.496646 -0.917480 0.156239  
C -3.017712 -0.093366 1.163218  
C -3.916501 0.917469 0.841041  
H -5.004709 1.907442 -0.741657  
H -2.458642 -1.357613 -1.951600  
C 2.552241 -0.782308 -0.348480  
C 3.737076 0.187354 -0.319256  
C 3.509121 1.395433 0.566807  
C 2.284313 2.152252 0.092867  
C 1.008237 1.306518 0.101691  
H 4.633129 -0.374503 -0.010332  
H 3.391964 1.087533 1.619687  
H 4.392491 2.051337 0.549874  
H 2.105044 3.050893 0.704759  
H 2.460684 2.512770 -0.935673  
H 3.933508 0.532270 -1.349512  
C 2.443822 -1.584007 0.950344  
H 1.493191 -2.133642 0.990595  
H 3.265518 -2.312462 1.010011  
H 2.500990 -0.952477 1.846435  
C 2.698187 -1.739738 -1.522607  
H 3.665228 -2.257285 -1.455415  
H 1.900573 -2.491295 -1.527168  
H 2.662048 -1.201986 -2.479946  
C 0.507383 1.066321 1.527993  
H 0.054635 1.987086 1.924623  
H -0.256061 0.277193 1.544184  
H 1.307573 0.770071 2.218823  
C -0.082110 1.996278 -0.705974  
H -1.031832 1.450973 -0.646231  
H -0.238630 3.011740 -0.315786  
H 0.197874 2.074136 -1.765562  
N 1.288191 -0.007769 -0.560082  
O 0.288215 -0.655340 -0.994912  
H -4.084831 0.450768 -2.535154  
H -4.325335 1.559262 1.625129  
C -1.520045 -1.974400 0.488728  
O -1.041443 -2.138695 1.591099  
H -1.252778 -2.644243 -0.368433  
H -2.699143 -0.268768 2.194327

**Orientation #13**

benzaldehyde/meta2/benzaldehyde-tempo-meta2.freq.out



C 4.583876 -1.353880 0.131573  
C 5.095737 -0.061860 -0.003673  
C 4.221890 1.016194 -0.106575  
C 2.835293 0.807943 -0.075386  
C 2.326267 -0.494422 0.060640  
C 3.202673 -1.567871 0.163603  
H 5.268345 -2.202377 0.212333  
H 4.607360 2.035299 -0.212908  
C -1.934821 -0.084009 1.336409  
C -2.448604 1.335731 1.088496  
C -3.285303 1.459866 -0.168523  
C -2.441257 1.065405 -1.363327  
C -1.924602 -0.372922 -1.293310  
H -3.010036 1.654431 1.981592  
H -4.193292 0.835004 -0.102314  
H -3.647228 2.492723 -0.283651  
H -2.997247 1.180850 -2.307802  
H -1.575855 1.745078 -1.423592  
H -1.582389 2.011908 1.004199  
C -3.047301 -1.006577 1.838781  
H -2.687425 -2.044217 1.865710  
H -3.350924 -0.720706 2.856237  
H -3.943379 -0.971928 1.203925  
C -0.800873 -0.051357 2.352165  
H -1.154219 0.404292 3.287892  
H -0.433682 -1.061270 2.570587  
H 0.037662 0.548305 1.972511  
C -3.032008 -1.385622 -1.593223  
H -3.328031 -1.326935 -2.650601  
H -2.670687 -2.403674 -1.393050  
H -3.933408 -1.217802 -0.987644  
C -0.781831 -0.557711 -2.282896  
H -0.408957 -1.588957 -2.271822  
H -1.128373 -0.319878 -3.298503  
H 0.051465 0.115085 -2.037691  
N -1.381159 -0.660213 0.071061  
O -0.711941 -1.734890 0.191449  
H 6.175607 0.100525 -0.027924  
H 2.804458 -2.579652 0.269153  
C 1.931078 1.961937 -0.188676  
O 0.719772 1.907604 -0.178299  
H 2.458272 2.949815 -0.291338  
H 1.246134 -0.661215 0.085599

**Orientation #14**

benzaldehyde/ald/benzaldehyde-tempo-ald.freq.out

C -4.819217 -1.150293 -0.041915  
C -3.534492 -1.694833 -0.050969  
C -2.424577 -0.853778 -0.015281  
C -2.605845 0.536458 0.029890  
C -3.899808 1.079179 0.038080  
C -5.002817 0.236073 0.002276  
H -5.689311 -1.811041 -0.069866

H -1.408223 -1.267018 -0.023573  
C 1.941079 -0.172394 -1.332868  
C 2.225662 1.324081 -1.181677  
C 3.017704 1.663622 0.065422  
C 2.247730 1.209874 1.289569  
C 1.964962 -0.294408 1.306991  
H 2.741642 1.666411 -2.093184  
H 4.016613 1.194893 0.034791  
H 3.202190 2.746939 0.114003  
H 2.779833 1.467366 2.219559  
H 1.289535 1.757219 1.328485  
H 1.267546 1.872264 -1.153227  
C 3.193783 -0.947075 -1.748929  
H 3.003617 -2.027344 -1.686074  
H 3.459973 -0.706785 -2.788282  
H 4.066823 -0.715461 -1.124479  
C 0.850753 -0.395536 -2.372504  
H 1.160882 0.042022 -3.331571  
H 0.655683 -1.463963 -2.521377  
H -0.093455 0.082413 -2.074477  
C 3.224464 -1.102851 1.625694  
H 3.512503 -0.957324 2.676827  
H 3.031386 -2.173131 1.468804  
H 4.084572 -0.815135 1.006472  
C 0.893802 -0.613453 2.341069  
H 0.699711 -1.691084 2.393032  
H 1.222144 -0.267033 3.330766  
H -0.054612 -0.109596 2.106758  
N 1.439993 -0.726397 -0.030955  
O 0.902684 -1.876918 -0.079115  
H -3.398534 -2.777850 -0.086052  
H -6.013160 0.651774 0.008412  
C -1.422745 1.411239 0.068028  
O -1.435281 2.621824 0.105717  
H -0.450959 0.845405 0.057840  
H -4.008214 2.166154 0.073020

**Orientation #15**

benzaldehyde/meta/benzaldehyde-tempo-meta.freq.out

C -2.339612 1.931636 -0.331472  
C -1.893272 0.680944 -0.762966  
C -2.721145 -0.428251 -0.602047  
C -3.983259 -0.294459 -0.009598  
C -4.419236 0.966592 0.423774  
C -3.599030 2.075517 0.260617  
H -1.698145 2.807360 -0.461193  
H -2.392806 -1.416559 -0.940751  
C 2.563235 1.167085 0.117398  
C 2.951753 0.850818 1.562804  
C 3.551733 -0.529066 1.737632  
C 2.539644 -1.567207 1.298896  
C 2.120546 -1.428281 -0.165755  
H 3.637243 1.639271 1.912181

|   |           |           |           |
|---|-----------|-----------|-----------|
| H | 4.487906  | -0.625793 | 1.161578  |
| H | 3.834722  | -0.691963 | 2.788188  |
| H | 2.916137  | -2.591351 | 1.450461  |
| H | 1.641706  | -1.477198 | 1.934422  |
| H | 2.051553  | 0.928802  | 2.196729  |
| C | 3.792526  | 1.464205  | -0.742534 |
| H | 3.498417  | 1.545222  | -1.797696 |
| H | 4.251063  | 2.415936  | -0.438480 |
| H | 4.562585  | 0.684930  | -0.661522 |
| C | 1.615682  | 2.358565  | 0.086135  |
| H | 2.094676  | 3.229165  | 0.555323  |
| H | 1.343306  | 2.620850  | -0.943411 |
| H | 0.691969  | 2.136841  | 0.639486  |
| C | 3.213802  | -1.925155 | -1.112775 |
| H | 3.323367  | -3.015958 | -1.031373 |
| H | 2.946750  | -1.682423 | -2.150166 |
| H | 4.193804  | -1.477218 | -0.898571 |
| C | 0.836025  | -2.207996 | -0.411651 |
| H | 0.527996  | -2.141503 | -1.462222 |
| H | 0.985900  | -3.265991 | -0.155415 |
| H | 0.018415  | -1.817914 | 0.211216  |
| N | 1.831140  | 0.006846  | -0.484722 |
| O | 1.276888  | 0.224098  | -1.607628 |
| H | -0.904981 | 0.573665  | -1.221220 |
| H | -3.935909 | 3.060365  | 0.592844  |
| C | -4.848902 | -1.476338 | 0.157353  |
| O | -5.948151 | -1.465377 | 0.660887  |
| H | -4.398529 | -2.431442 | -0.231240 |
| H | -5.407963 | 1.043577  | 0.882942  |

#### Orientation #16

benzaldehyde/ortho2/benzaldehyde-tempo-ortho2.freq.out

|   |           |           |           |
|---|-----------|-----------|-----------|
| C | 3.070878  | -2.303412 | -0.022540 |
| C | 4.119830  | -1.766575 | 0.726851  |
| C | 4.291932  | -0.386365 | 0.779685  |
| C | 3.417081  | 0.461280  | 0.086203  |
| C | 2.367261  | -0.086242 | -0.666405 |
| C | 2.195613  | -1.464179 | -0.718357 |
| H | 2.934936  | -3.387260 | -0.065094 |
| H | 5.108934  | 0.050231  | 1.363221  |
| C | -2.300914 | -1.250965 | -0.054797 |
| C | -2.873113 | -1.064546 | 1.351696  |
| C | -3.449382 | 0.316047  | 1.589147  |
| C | -2.361232 | 1.350420  | 1.388230  |
| C | -1.749642 | 1.332706  | -0.014161 |
| H | -3.623910 | -1.852622 | 1.522942  |
| H | -4.300125 | 0.506060  | 0.912526  |
| H | -3.861868 | 0.387647  | 2.606704  |
| H | -2.729343 | 2.369583  | 1.586731  |
| H | -1.558571 | 1.169495  | 2.124087  |
| H | -2.069153 | -1.245677 | 2.086177  |
| C | -3.409941 | -1.390964 | -1.099400 |
| H | -2.976042 | -1.362577 | -2.108279 |

H -3.930897 -2.351436 -0.976487  
H -4.163965 -0.595582 -1.029332  
C -1.416862 -2.490161 -0.090044  
H -1.989801 -3.363993 0.250686  
H -1.052571 -2.689239 -1.105028  
H -0.545873 -2.372003 0.570084  
C -2.696339 1.942014 -1.049601  
H -2.782932 3.026740 -0.893208  
H -2.299899 1.773253 -2.060087  
H -3.709281 1.519584 -1.003277  
C -0.438429 2.104505 -0.010185  
H -0.003128 2.177964 -1.013394  
H -0.607391 3.124619 0.361597  
H 0.302143 1.625141 0.645103  
N -1.440548 -0.078802 -0.416069  
O -0.716066 -0.220960 -1.450399  
H 4.801187 -2.427051 1.267938  
H 1.368415 -1.875107 -1.300602  
C 3.602856 1.921651 0.159973  
O 2.888226 2.743237 -0.366783  
H 4.492911 2.238126 0.772088  
H 1.685205 0.576217 -1.202923

**Orientation #17**

benzaldehyde/para/benzaldehyde-tempo-para.freq.out

C -1.821175 -0.331722 -1.008812  
C -2.304024 0.977987 -0.979974  
C -3.558104 1.243018 -0.436382  
C -4.336425 0.199922 0.082047  
C -3.848554 -1.115081 0.048816  
C -2.597251 -1.376670 -0.495139  
H -0.831111 -0.525784 -1.430995  
H -3.949495 2.265171 -0.408356  
C 2.394123 1.338379 0.098150  
C 2.757744 1.178562 1.575312  
C 3.582176 -0.059606 1.861732  
C 2.795620 -1.285976 1.447085  
C 2.429723 -1.302836 -0.038441  
H 3.275140 2.095022 1.900966  
H 4.549563 -0.017260 1.332617  
H 3.834175 -0.111713 2.931350  
H 3.342385 -2.214954 1.674490  
H 1.865831 -1.328034 2.040375  
H 1.826200 1.129801 2.165378  
C 3.596935 1.791028 -0.731278  
H 3.349353 1.748818 -1.800665  
H 3.864255 2.827616 -0.481048  
H 4.487235 1.170451 -0.561499  
C 1.264552 2.348250 -0.050541  
H 1.561452 3.307323 0.396220  
H 1.020358 2.515246 -1.106300  
H 0.355840 1.998629 0.459655  
C 3.639488 -1.635861 -0.912877

|   |           |           |           |
|---|-----------|-----------|-----------|
| H | 3.938396  | -2.683876 | -0.768372 |
| H | 3.384174  | -1.494249 | -1.971833 |
| H | 4.512234  | -1.009138 | -0.684828 |
| C | 1.326906  | -2.323680 | -0.283486 |
| H | 1.065667  | -2.380136 | -1.347391 |
| H | 1.659894  | -3.317340 | 0.047028  |
| H | 0.420479  | -2.062975 | 0.281039  |
| N | 1.895920  | 0.035864  | -0.450240 |
| O | 1.352301  | 0.090272  | -1.597781 |
| H | -1.692799 | 1.787032  | -1.386690 |
| H | -2.216591 | -2.401008 | -0.525349 |
| C | -5.662289 | 0.486142  | 0.659323  |
| O | -6.405254 | -0.340807 | 1.135020  |
| H | -5.949754 | 1.573621  | 0.627320  |
| H | -4.477366 | -1.910165 | 0.457441  |

#### Orientation #18

nitrobenzene/tshape/nitrobenzene-tempo-tshape.freq.out

|   |           |           |           |
|---|-----------|-----------|-----------|
| C | -2.930927 | -2.467273 | 0.000046  |
| C | -1.685357 | -1.837405 | 0.000007  |
| C | -1.615523 | -0.446728 | -0.000064 |
| C | -2.796399 | 0.289479  | -0.000066 |
| C | -4.048730 | -0.322006 | 0.000000  |
| C | -4.106893 | -1.712323 | 0.000040  |
| H | -2.987300 | -3.558061 | 0.000079  |
| H | -0.754967 | -2.412491 | 0.000023  |
| H | -0.653973 | 0.068302  | -0.000165 |
| H | -4.945698 | 0.297074  | 0.000015  |
| H | -5.078026 | -2.211421 | 0.000063  |
| C | 2.037971  | -0.098693 | -1.318630 |
| C | 1.695954  | 1.390870  | -1.239067 |
| C | 2.241459  | 2.072870  | -0.000172 |
| C | 1.695789  | 1.391110  | 1.238778  |
| C | 2.037782  | -0.098435 | 1.318707  |
| H | 2.061230  | 1.875674  | -2.158654 |
| H | 3.345376  | 2.061248  | -0.000112 |
| H | 1.956603  | 3.135417  | -0.000270 |
| H | 2.060909  | 1.876126  | 2.158316  |
| H | 0.597997  | 1.508034  | 1.250157  |
| H | 0.598170  | 1.507808  | -1.250621 |
| C | 3.510843  | -0.327425 | -1.665895 |
| H | 3.766281  | -1.388649 | -1.539568 |
| H | 3.697287  | -0.054826 | -2.714508 |
| H | 4.195477  | 0.267001  | -1.047447 |
| C | 1.172825  | -0.776416 | -2.372117 |
| H | 1.330246  | -0.288938 | -3.344106 |
| H | 1.422129  | -1.839453 | -2.469016 |
| H | 0.104588  | -0.699130 | -2.126901 |
| C | 3.510581  | -0.327118 | 1.666304  |
| H | 3.696819  | -0.054298 | 2.714896  |
| H | 3.766034  | -1.388370 | 1.540247  |
| H | 4.195324  | 0.267184  | 1.047858  |
| C | 1.172445  | -0.775897 | 2.372208  |

|   |           |           |           |
|---|-----------|-----------|-----------|
| H | 1.421719  | -1.838917 | 2.469393  |
| H | 1.329707  | -0.288201 | 3.344111  |
| H | 0.104254  | -0.698662 | 2.126783  |
| N | 1.736846  | -0.749817 | 0.000088  |
| O | 1.664149  | -2.019048 | 0.000217  |
| N | -2.719649 | 1.760279  | -0.000136 |
| O | -1.608051 | 2.270597  | -0.000428 |
| O | -3.768783 | 2.380534  | 0.000122  |

#### Orientation #19

nitrobenzene/bite-orthometa/nitrobenzene-tempo-bite-orthometa.freq.out

|   |           |           |           |
|---|-----------|-----------|-----------|
| C | -4.372294 | 1.751384  | -0.000068 |
| C | -2.984879 | 1.899252  | -0.000316 |
| C | -2.155733 | 0.780231  | -0.000342 |
| C | -2.751072 | -0.479926 | -0.000093 |
| C | -4.134991 | -0.652073 | 0.000158  |
| C | -4.945955 | 0.477646  | 0.000165  |
| H | -5.014172 | 2.635261  | -0.000040 |
| H | -2.533416 | 2.893376  | -0.000477 |
| H | -1.069572 | 0.894544  | -0.000556 |
| H | -4.546821 | -1.661083 | 0.000350  |
| H | -6.031876 | 0.364382  | 0.000357  |
| C | 2.072814  | 0.251102  | 1.322171  |
| C | 2.499815  | -1.215582 | 1.235003  |
| C | 3.319671  | -1.531069 | 0.000394  |
| C | 2.500223  | -1.215784 | -1.234530 |
| C | 2.073144  | 0.250853  | -1.322078 |
| H | 3.046859  | -1.465709 | 2.158297  |
| H | 4.266927  | -0.963942 | 0.000515  |
| H | 3.612537  | -2.591677 | 0.000521  |
| H | 3.047575  | -1.466031 | -2.157608 |
| H | 1.594710  | -1.844651 | -1.228972 |
| H | 1.594260  | -1.844407 | 1.229249  |
| C | 3.241827  | 1.157863  | 1.713628  |
| H | 2.945218  | 2.211668  | 1.620483  |
| H | 3.533906  | 0.974229  | 2.757605  |
| H | 4.130920  | 0.996416  | 1.088981  |
| C | 0.950902  | 0.401918  | 2.340670  |
| H | 1.289270  | 0.035038  | 3.319781  |
| H | 0.646411  | 1.450098  | 2.445592  |
| H | 0.073233  | -0.186547 | 2.039725  |
| C | 3.242195  | 1.157593  | -1.713455 |
| H | 3.534516  | 0.973766  | -2.757330 |
| H | 2.945542  | 2.211410  | -1.620565 |
| H | 4.131143  | 0.996282  | -1.088567 |
| C | 0.951476  | 0.401396  | -2.340893 |
| H | 0.647055  | 1.449557  | -2.446220 |
| H | 1.290071  | 0.034213  | -3.319811 |
| H | 0.073711  | -0.186936 | -2.039980 |
| N | 1.540944  | 0.709048  | -0.000064 |
| O | 0.910296  | 1.813502  | -0.000267 |
| N | -1.897774 | -1.679124 | -0.000064 |
| O | -0.684426 | -1.511341 | -0.000181 |

O -2.445003 -2.768104 0.000081

**Orientation #20**

nitrobenzene/ortho/nitrobenzene-tempo-orthoCH.freq.out

C -3.252988 -2.101629 0.734961  
C -3.085835 -1.791026 -0.617072  
C -2.694026 -0.512308 -0.998427  
C -2.464790 0.437945 -0.007126  
C -2.619420 0.149049 1.345364  
C -3.020931 -1.133461 1.712637  
H -3.565315 -3.106555 1.027774  
H -3.260813 -2.553327 -1.379360  
H -2.538762 -0.234252 -2.040500  
H -2.428650 0.928814 2.083149  
H -3.155461 -1.376798 2.768617  
C 1.657339 -1.392437 -0.460388  
C 3.157906 -1.571367 -0.219356  
C 3.712855 -0.651594 0.849629  
C 3.463939 0.790369 0.454331  
C 1.980883 1.122726 0.278427  
H 3.343426 -2.630379 0.022099  
H 3.254385 -0.871411 1.829104  
H 4.790215 -0.831085 0.983239  
H 3.887047 1.489906 1.192707  
H 3.987252 0.996494 -0.495603  
H 3.690767 -1.377701 -1.166535  
C 0.822778 -2.007145 0.665231  
H -0.229774 -1.709772 0.552560  
H 0.873681 -3.104908 0.621983  
H 1.159830 -1.700258 1.664444  
C 1.264620 -2.035999 -1.783470  
H 1.568895 -3.092091 -1.784868  
H 0.181523 -1.984020 -1.946075  
H 1.757714 -1.535468 -2.627974  
C 1.260764 1.205298 1.625805  
H 1.600838 2.092712 2.178800  
H 0.179029 1.308297 1.466871  
H 1.441581 0.329387 2.263310  
C 1.820826 2.444888 -0.459933  
H 0.767390 2.739931 -0.536181  
H 2.362664 3.233750 0.080206  
H 2.232743 2.380500 -1.476379  
N 1.333333 0.065046 -0.561063  
O 0.198145 0.350966 -1.050468  
N -2.054218 1.793602 -0.406017  
O -1.676004 2.548610 0.479803  
O -2.131833 2.085156 -1.583774

**Orientation #21**

nitrobenzene/para/nitrobenzene-tempo-paraCH.freq.out

C 1.806927 1.056703 -0.796680

|   |           |           |           |
|---|-----------|-----------|-----------|
| C | 1.903816  | 0.368550  | 0.415190  |
| C | 3.134497  | -0.115143 | 0.848255  |
| C | 4.255242  | 0.102832  | 0.049371  |
| C | 4.181271  | 0.787180  | -1.161497 |
| C | 2.942773  | 1.264981  | -1.581163 |
| H | 0.827781  | 1.422940  | -1.113761 |
| H | 1.000483  | 0.219960  | 1.010495  |
| H | 3.250072  | -0.655611 | 1.787751  |
| H | 5.089105  | 0.930909  | -1.747209 |
| H | 2.865200  | 1.804267  | -2.527634 |
| C | -3.561773 | 0.951924  | 0.482864  |
| C | -4.810798 | 0.369723  | -0.181742 |
| C | -4.797624 | -1.142507 | -0.270748 |
| C | -3.593583 | -1.584410 | -1.077119 |
| C | -2.259740 | -1.142111 | -0.471947 |
| H | -5.692716 | 0.735751  | 0.367693  |
| H | -4.780744 | -1.593580 | 0.736106  |
| H | -5.724531 | -1.505268 | -0.739274 |
| H | -3.567319 | -2.678857 | -1.199641 |
| H | -3.674326 | -1.166788 | -2.095730 |
| H | -4.894441 | 0.785211  | -1.200970 |
| C | -3.578459 | 0.737747  | 1.997409  |
| H | -2.608273 | 1.023902  | 2.425921  |
| H | -4.354954 | 1.362227  | 2.461709  |
| H | -3.782710 | -0.304435 | 2.277389  |
| C | -3.461081 | 2.441033  | 0.182661  |
| H | -4.371607 | 2.950810  | 0.526762  |
| H | -2.596960 | 2.890249  | 0.684990  |
| H | -3.356759 | 2.619153  | -0.896500 |
| C | -1.901602 | -1.972156 | 0.762109  |
| H | -1.657026 | -3.002875 | 0.468388  |
| H | -1.021855 | -1.544447 | 1.262481  |
| H | -2.719097 | -2.022689 | 1.493622  |
| C | -1.151951 | -1.274712 | -1.508096 |
| H | -0.169449 | -1.043281 | -1.079541 |
| H | -1.126909 | -2.303540 | -1.893196 |
| H | -1.321077 | -0.596699 | -2.356413 |
| N | -2.334993 | 0.302083  | -0.081634 |
| O | -1.230973 | 0.868571  | 0.190851  |
| N | 5.562361  | -0.407073 | 0.500031  |
| O | 5.595999  | -1.014738 | 1.557726  |
| O | 6.528606  | -0.190108 | -0.213004 |

#### Orientation #22

nitrobenzene/stackedtshape/nitrobenzene-tempo-stackedtshape.freq.out

|   |           |           |           |
|---|-----------|-----------|-----------|
| C | -2.531439 | 2.652338  | -0.024409 |
| C | -1.764271 | 1.762649  | 0.728591  |
| C | -2.093046 | 0.410076  | 0.761710  |
| C | -3.193204 | -0.025156 | 0.027908  |
| C | -3.972894 | 0.846278  | -0.731065 |
| C | -3.633084 | 2.195141  | -0.752213 |
| H | -2.269741 | 3.712996  | -0.046459 |
| H | -0.893943 | 2.103378  | 1.291866  |



|   |           |           |           |
|---|-----------|-----------|-----------|
| H | -1.496584 | -0.295398 | 1.339057  |
| H | -4.823726 | 0.452826  | -1.286954 |
| H | -4.231034 | 2.894308  | -1.340461 |
| C | 1.825759  | -1.391086 | 0.000472  |
| C | 2.430225  | -1.475806 | -1.402469 |
| C | 3.626606  | -0.568376 | -1.601280 |
| C | 3.207250  | 0.867716  | -1.364180 |
| C | 2.657616  | 1.116515  | 0.041724  |
| H | 2.683394  | -2.529292 | -1.601223 |
| H | 4.449393  | -0.852098 | -0.922935 |
| H | 4.030477  | -0.685034 | -2.618007 |
| H | 4.041326  | 1.567295  | -1.534036 |
| H | 2.429610  | 1.137246  | -2.099855 |
| H | 1.652504  | -1.206904 | -2.138196 |
| C | 2.702375  | -2.099248 | 1.034768  |
| H | 2.330536  | -1.886976 | 2.046386  |
| H | 2.668686  | -3.187045 | 0.879745  |
| H | 3.755385  | -1.790964 | 0.984137  |
| C | 0.438501  | -2.015928 | 0.000830  |
| H | 0.493967  | -3.045607 | -0.378633 |
| H | 0.005725  | -2.049518 | 1.007205  |
| H | -0.249792 | -1.454365 | -0.646898 |
| C | 3.773531  | 1.132519  | 1.087873  |
| H | 4.397543  | 2.029519  | 0.965934  |
| H | 3.338531  | 1.151798  | 2.096452  |
| H | 4.435153  | 0.258839  | 1.017332  |
| C | 1.915784  | 2.445862  | 0.075274  |
| H | 1.573436  | 2.684662  | 1.089407  |
| H | 2.582715  | 3.250885  | -0.263653 |
| H | 1.039588  | 2.425179  | -0.588345 |
| N | 1.672314  | 0.046100  | 0.401113  |
| O | 0.963388  | 0.267621  | 1.432580  |
| N | -3.545408 | -1.456493 | 0.047016  |
| O | -2.838813 | -2.203729 | 0.704312  |
| O | -4.520794 | -1.805634 | -0.598139 |

### Orientation #23

nitrobenzene/meta/nitrobenzene-tempo-metaCH.freq.out

|   |           |           |           |
|---|-----------|-----------|-----------|
| C | 2.562620  | 2.429222  | -0.205845 |
| C | 1.840552  | 1.237120  | -0.301145 |
| C | 2.502020  | 0.018527  | -0.168616 |
| C | 3.876214  | 0.019103  | 0.058451  |
| C | 4.610854  | 1.198180  | 0.156150  |
| C | 3.940191  | 2.410394  | 0.021058  |
| H | 2.042212  | 3.383743  | -0.310806 |
| H | 0.759701  | 1.258437  | -0.477047 |
| H | 1.978092  | -0.935735 | -0.236931 |
| H | 5.684675  | 1.143722  | 0.334362  |
| H | 4.497309  | 3.346759  | 0.093557  |
| C | -3.613823 | 0.808862  | 0.235120  |
| C | -4.669840 | -0.296086 | 0.169285  |
| C | -4.136966 | -1.663047 | 0.546734  |
| C | -3.014344 | -2.038637 | -0.398663 |

|   |           |           |           |
|---|-----------|-----------|-----------|
| C | -1.841607 | -1.056087 | -0.374424 |
| H | -5.515393 | 0.000674  | 0.810087  |
| H | -3.787302 | -1.671594 | 1.593211  |
| H | -4.940993 | -2.412490 | 0.500318  |
| H | -2.621164 | -3.044558 | -0.181885 |
| H | -3.415230 | -2.084394 | -1.426027 |
| H | -5.069476 | -0.341631 | -0.858651 |
| C | -3.290059 | 1.192325  | 1.680181  |
| H | -2.427091 | 1.871763  | 1.701521  |
| H | -4.145051 | 1.709919  | 2.138077  |
| H | -3.055844 | 0.322565  | 2.308649  |
| C | -4.101797 | 2.038110  | -0.519020 |
| H | -5.058352 | 2.376724  | -0.097375 |
| H | -3.378202 | 2.858291  | -0.451269 |
| H | -4.257637 | 1.811191  | -1.582661 |
| C | -1.000265 | -1.222714 | 0.892752  |
| H | -0.442786 | -2.170047 | 0.860534  |
| H | -0.273977 | -0.402421 | 0.978677  |
| H | -1.608420 | -1.230310 | 1.807253  |
| C | -0.967745 | -1.270516 | -1.602874 |
| H | -0.097144 | -0.604516 | -1.601196 |
| H | -0.610620 | -2.309472 | -1.628769 |
| H | -1.531960 | -1.079259 | -2.525940 |
| N | -2.353572 | 0.350494  | -0.433184 |
| O | -1.492300 | 1.254504  | -0.668789 |
| N | 4.575613  | -1.270543 | 0.200999  |
| O | 5.778184  | -1.240323 | 0.404156  |
| O | 3.907159  | -2.287373 | 0.107476  |
